# Supplementary material for: Model-Informed Precision Dosing Software Tools for Dosage Regimen Individualization: A Scoping Review
Source: MDPI journal article supplement (doi:10.3390/pharmaceutics15071859), 2023-07-01
Supplement: s1 [file s1]

**Supplementary Figure S1.** Preferred Reporting Items for Systematic reviews and Meta-Analyses extension for Scoping Reviews (PRISMA-ScR) Checklist [9].

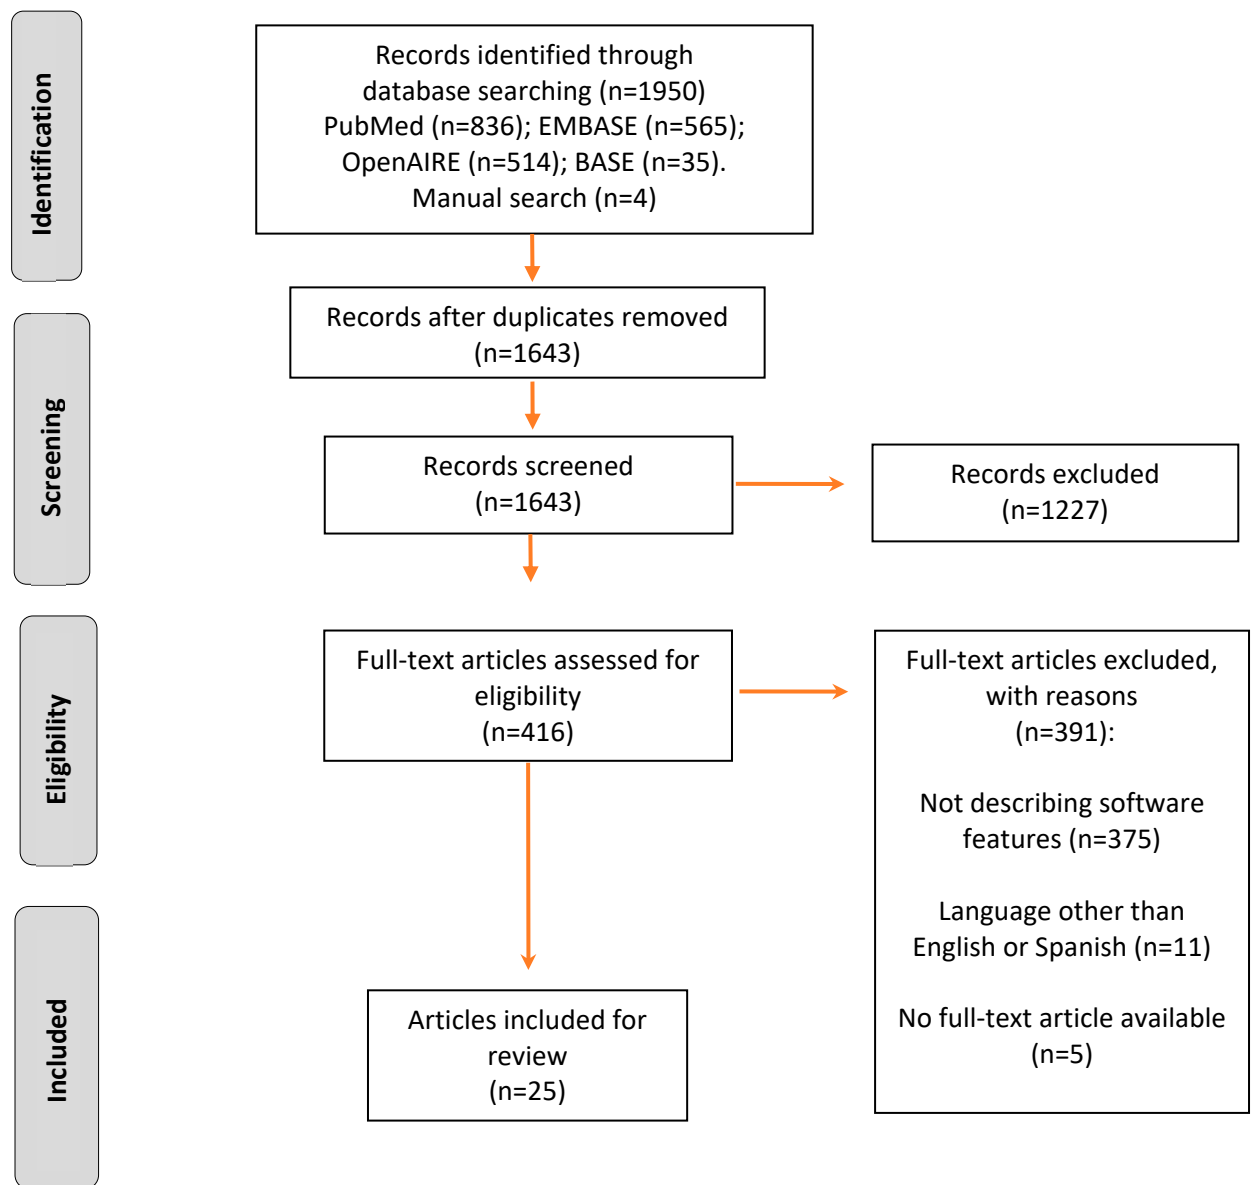

**Supplementary Table S1.** Search strategy

| Databases           | Search strategy                                                                                                                                                         |
|---------------------|-------------------------------------------------------------------------------------------------------------------------------------------------------------------------|
| MEDLINE<br>(PubMed) | ("therapeutic drug monitoring" OR "Drug Dosage Calculations")<br>AND ("software" OR "Drug Therapy, Computer-Assisted" [MeSH<br>Terms] OR "Population pharmacokinetics") |
| Embase              | ('therapeutic drug monitoring' OR 'drug dosage calculations')<br>AND ('software'/exp OR 'computer assisted drug therapy'/exp<br>OR 'population pharmacokinetics'/exp)   |
| OpenAire            | ("therapeutic drug monitoring" AND "software")                                                                                                                          |
| BASE                | ("therapeutic drug monitoring", "drug therapy software", "drug<br>dosage software" AND "pharmacokinetic software")                                                      |

**Supplementary Table S2.** Summary of the articles included in this review

|    | Author, year                  | Country     | Objective                                                                                                                                                                                        | Software described |
|----|-------------------------------|-------------|--------------------------------------------------------------------------------------------------------------------------------------------------------------------------------------------------|--------------------|
| 1  | Hatton et al.<br>1984 [17]    | USA         | Compare the accuracy of microcomputer-predicted versus trough serum concentrations during long-term tobramycin therapy                                                                           | CAPCIL (SIMKIN)    |
| 2  | Deci et al.<br>1985 [18]      | USA         | Assess the ability of a computer program Simulated Kinetics (SIMKIN) to predict serum theophylline concentrations in ambulatory patients receiving oral theophylline                             | CAPCIL (SIMKIN)    |
| 3  | Leal et al.<br>1991 [19]      | Belgium     | Describe a software developed to optimize aminoglycosides monitoring, responding to the demands of most clinical daily situations                                                                | PHAR-MONITOR       |
| 4  | Messori et al.<br>1992 [6]    | Italy       | Present a microcomputer program which analyses multiple-dose pharmacokinetic curves using either a least-squares nonlinear analysis or a Bayesian fit                                            | PKRD               |
| 5  | Proost et al.<br>1992 [20]    | Netherlands | Describe the main features of MW/PHARM and exemplify with gentamicin and phenytoin                                                                                                               | MWPHARM            |
| 6  | Gill et al. 1992<br>[21]      | USA         | Report the use of a new method to determine patient population pharmacokinetic parameters compared to a more traditional approach                                                                | NPEM (USC*PACK)    |
| 7  | McMichael et al. 1993 [22]    | USA         | Validate an intelligent dosing system (IDS) used to guide all doses to prospectively achieve the target concentration range specified in autoimmune disorders                                    | IDS                |
| 8  | Ismail et al.<br>1993 [23]    | Malaysia    | Estimate individual and population pharmacokinetics for carbamazepine in Malaysian epileptic patients using the OPT computer program                                                             | OPT                |
| 9  | Lacarelle et al.<br>1994 [24] | France      | Validate a new software package in routine clinical practice for amikacin and theophylline                                                                                                       | PKS                |
| 10 | Jerling, 1996<br>[25]         | Sweden      | Demonstrate how the population approach can be used to evaluate different kinetic and dynamic aspects of a drug and to give some suggestions for how to utilize the results in clinical practice | NPML               |
| 11 | Falcao et al.                 | Portugal    | Study the kinetic behaviour of theophylline administered concomitantly with methylprednisolone and auranofin, using PKS                                                                          | PKS and CAPCIL     |

|    |                            |             |                                                                                                                                                                                                                                                                                                                                         |                                                                                                                                                            |
|----|----------------------------|-------------|-----------------------------------------------------------------------------------------------------------------------------------------------------------------------------------------------------------------------------------------------------------------------------------------------------------------------------------------|------------------------------------------------------------------------------------------------------------------------------------------------------------|
|    | 2000 [26]                  |             | and CAPCIL for the kinetic analysis                                                                                                                                                                                                                                                                                                     |                                                                                                                                                            |
| 12 | Wright et al. 2011 [27]    | New Zealand | Develop a Bayesian dose individualisation tool for warfarin and incorporate it into the freely available software TCIWorks for use in the clinic                                                                                                                                                                                        | TCIWorks                                                                                                                                                   |
| 13 | Neely et al. 2012 [28]     | USA         | Describe “Pmetrics”, a newly software package and test the theoretical advantage of the nonparametric approach to accurately characterize subpopulations and outliers by estimating population and individual pharmacokinetic parameters in a simulated data set with the parametric IT2B and nonparametric NPAG algorithms in Pmetrics | NPAG and IT2B                                                                                                                                              |
| 14 | Fuchs et al. 2013 [7]      | Switzerland | Assess and compare computer tools designed to support TDM clinical activities                                                                                                                                                                                                                                                           | JPKD, TDM for R, RxKinetics (Antibiotic Kinetics, APK and Kinetics), Kinetidex, T.D.M.S. 2000, DataKineticsTM, RADKinetics, MM-USC*PACK, TCIWorks, MwPharm |
| 15 | Felton et al. 2014 [29]    | UK          | Establish a population PK model for piperacillin in critically ill patients and analyze the performance of the model in the dose optimization software program BestDose                                                                                                                                                                 | BestDose                                                                                                                                                   |
| 16 | Dubovitska et al. 2017 [2] | Switzerland | Present TUCUXI – an intelligent system for TDM and discuss ethical issues related to the use of an automated decision support system in clinical practice                                                                                                                                                                               | TUCUXI                                                                                                                                                     |
| 17 | Owens et al. 2018 [14]     | USA         | Explain advances in technology that allow clinicians to apply PK-PD to optimize the agents and dosing regimens selected for the treatment of hospitalized patients with infection                                                                                                                                                       | PK-PD Compass, TDMx, DoseMeRx and InsightRx                                                                                                                |
| 18 | Nugroho et al. 2019 [30]   | Indonesia   | Simulate the capability of Monolix, NONMEM, and WinBUGS-PKBUGS to analyze very sparse Cp-time data after an intravenous bolus drug administration and to estimate the minimum number of Cp-time data required for an adequate analysis                                                                                                  | Monolix, NONMEM, and WinBUGS-PKBUGS                                                                                                                        |
| 19 | Okour, 2020 [31]           | USA         | Present DosePredict, a Shiny-based graphical user interface software that can be used for                                                                                                                                                                                                                                               | DosePredict                                                                                                                                                |

|    |                                |                |                                                                                                                                                                                                                    |                                                                                                                  |
|----|--------------------------------|----------------|--------------------------------------------------------------------------------------------------------------------------------------------------------------------------------------------------------------------|------------------------------------------------------------------------------------------------------------------|
|    |                                |                | the conduct of dose predictions                                                                                                                                                                                    |                                                                                                                  |
| 20 | Kantasiripitak et al. 2020 [1] | Belgium        | Identifying the requirements for and evaluating the performance of the currently available model-informed precision dosing software tools                                                                          | DoseMeRx, InsightRX Nova, MwPharm++, PrecisePK, Kinetics, BestDose, ID-ODS, NextDose, Tucuxi, Autokinetics, TDMx |
| 21 | Porubán et al. 2020 [32]       | Czech Republic | Compare the usefulness of DOS and Windows version (WIN) of the MwPharm, and their prediction quality in TDM of digoxin                                                                                             | MwPharm                                                                                                          |
| 22 | Ryan et al. 2021 [33]          | Australia      | Evaluate amikacin prescribing and TDM practices, and determine the suitability of the amikacin model incorporated into the DoseMeRx® software as a replacement for the previously available software (Abbottbase®) | Abbottbase, DoseMeRx                                                                                             |
| 23 | Dave et al. 2021 [34]          | Germany        | Compare measured Infliximab concentrations in the laboratory with values predicted by iDose dashboard system and report its efficacy in managing patients not responding to conventional dosing schedule           | iDose                                                                                                            |
| 24 | Sturkenboom et al. 2021 [35]   | Australia      | Provide an update on the pharmacokinetics and pharmacodynamics of anti-tuberculosis drugs and to show how population pharmacokinetics and Bayesian dose adjustment can be used to optimize treatment.              | NONMEM, Pmetrics, ADAPT, MwPharm, Monolix, Phoenix, and NPEM2                                                    |
| 25 | Heitzmann et al. 2022 [36]     | France         | Implement and compare two pharmacometric tools for daptomycin TDM and precision dosing                                                                                                                             | BestDose and TUCUXI                                                                                              |

**Supplementary Table S3.** Software tools for modelling or research

| Function/use | Software tool                                                            |
|--------------|--------------------------------------------------------------------------|
| Modelling    | ADAPT, IT2B, NPAG, NPML, Monolix, PhoenixNLME, WinBUGS-PKBUGS, WinNonlin |
| Research     | DosePredict                                                              |
